# Supplementary material
Source: HighWire-hosted journal article supplement (https://www.rcpjournals.org/highwire/filestream/8495/field_highwire_adjunct_files/0/Dunbar-Rees_supp_file_1.pdf)
Supplement: Dunbar-Rees_supp_file_1.pdf [file Dunbar-Rees_supp_file_1.pdf]

### Supplementary file 1. Reimbursement models – key characteristics

|                      | <b>Block</b>                                                                                       | <b>Capitation</b>                                                            | <b>Case-based</b>                                                                                  | <b>Fee-for-service</b>                                                                             | <b>Pay-for-performance</b>                                                      |
|----------------------|----------------------------------------------------------------------------------------------------|------------------------------------------------------------------------------|----------------------------------------------------------------------------------------------------|----------------------------------------------------------------------------------------------------|---------------------------------------------------------------------------------|
| <b>Definition</b>    | Provision of services for a specific time period                                                   | Provision of care for a specific patient population                          | Provision of fixed sum for episodes of care                                                        | Provision of specific services                                                                     | Payment that rewards or penalises providers for aspects of their performance    |
| <b>Payment basis</b> | Historical prices                                                                                  | Population characteristics and demographics                                  | Episode of care                                                                                    | Delivery of specific service                                                                       | Achievement of performance thresholds                                           |
| <b>Type</b>          | Prospective                                                                                        | Prospective                                                                  | Retrospective                                                                                      | Retrospective                                                                                      | Retrospective                                                                   |
| <b>Advantages</b>    | Low transaction costs                                                                              | Relatively low transaction costs, although higher than block contracts       | Increased competition can boost care quality where tariffs are fixed                               | Increased competition can boost care quality where tariffs are fixed                               | Potential to enhance quality and efficiency of care delivered                   |
|                      | Budget is predictable, allowing for financial control                                              | Budget is predictable, allowing for financial control                        | Providers incentivised to reduce cost per episode since 'currency' is fixed                        | No provider incentive to withhold care; they are paid for every service                            | Financial reward and penalties incentivises providers to comply with guidelines |
|                      | Flexibility for providers to change services offered without it having an impact on their finances | Budget is adjusted according to population characteristics and demographics  | Quality improvement might be incentivised to attract patients                                      | Quality improvement might be incentivised to attract patients                                      | System that enables comparison between providers, increasing competition        |
|                      |                                                                                                    | Takes into consideration social and health inequalities in target population | More transparency around cost allocation and activity                                              | Full transparency around cost allocation and activity                                              | Full transparency around cost allocation and activity                           |
| <b>Disadvantages</b> | Lack of transparency and accountability                                                            | Risk posed by increased activity and cost of care                            | Providers are incentivised to increase activity in what may not be the most effective care setting | Providers are incentivised to increase activity in what may not be the most effective care setting | Frequently rewards compliance with processes of care rather than outcomes       |

|                                        |                                                                                                                                                              |                                                                                                                                                              |                                                                                                      |                                                                                         |                                                                                               |
|----------------------------------------|--------------------------------------------------------------------------------------------------------------------------------------------------------------|--------------------------------------------------------------------------------------------------------------------------------------------------------------|------------------------------------------------------------------------------------------------------|-----------------------------------------------------------------------------------------|-----------------------------------------------------------------------------------------------|
|                                        | Spending limit constrains volume of services provided                                                                                                        | Risk posed by sudden changes in demographics                                                                                                                 | Incorrect coding can result in over or underpayment                                                  | Provider incentivised to offer more services, even if unnecessary                       | Risk of becoming a 'tick-box' exercise, rather than improving care for patients               |
|                                        | Risk posed by increased activity and cost of care                                                                                                            | Incentive for provider to not deliver care that is complex/costly                                                                                            | Incentive to reduce cost per episode of care might compromise quality where prices                   | High transaction costs; requires complex administration of services                     | Attention shift: risk that unrewarded work may be sacrificed                                  |
|                                        | Pressure on 'good' providers that attract more activity                                                                                                      |                                                                                                                                                              | Higher transaction costs due to need of a more sophisticated billing system                          | No incentive for provider to focus on prevention, taking a population-level approach    | Higher transaction costs due to need for a more sophisticated billing system                  |
| <b>Impact on outcomes for patients</b> | No specific focus on delivery of outcomes; providers may choose to 'under deliver' services if there are costs/activity pressures, impacting quality of care | No specific focus on delivery of outcomes; providers may choose to 'under deliver' services if there are costs/activity pressures, impacting quality of care | Incentive to reduce costs in order to improve profits may have a negative impact on patient outcomes | Incentive to increase activity without explicit considerations of outcomes for patients | As measurement is frequently related to care processes, model doesn't closely impact outcomes |

Source: Outcomes Based Healthcare, *Contracting for Outcomes*. Adapted from: Marshall L, Charlesworth A and Hurst J. *The NHS payment system: evolving policy and emerging evidence*. Nuffield Trust, 2014.
